# Supplementary material for: Functional impact of multi-omic interactions in breast cancer subtypes
Source: Frontiers journal article supplement (doi:10.3389/fgene.2022.1078609), 2023-01-05
Supplement: Data_Sheet_1.PDF [file Data_Sheet_1.PDF]

## ***Supplementary Material***

### **1 SUPPLEMENTARY DATA**

### **2 SUPPLEMENTARY TABLES AND FIGURES**

#### **2.1 Tables**

**Table S1.** Functional enrichment results for the gene ontology of biological processes.

**Table S2.** Functional enrichment results for the KEGG pathways

**Table S3.** Clustering results for functions enriched in the four breast cancer subtypes and the normal tissue

#### **2.2 Figures**

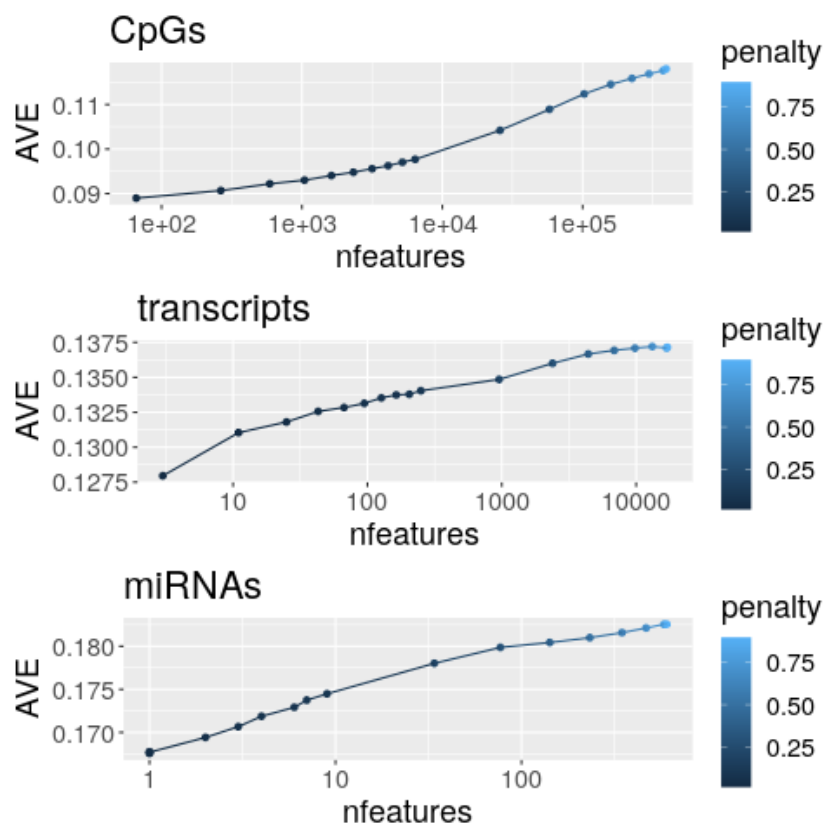

**Figure S1.** Selection of the sparsity parameters. Sparsity parameters were fitted by cross-validation, testing 18 values within  $[0.01, \dots, 0.09, 0.1, \dots, 0.9]$ . Each combination of three values, for the three omics, was tested 10 times, adding a total of 11340 instances for every value per omic. The median number of features (nfeatures) and average variance explained (AVE), no matter the other two omics, is shown as a dot. We choose the dot before the largest change in slope, namely, 0.02 for the CpG sites and transcripts, and 0.05 for the microRNAs.

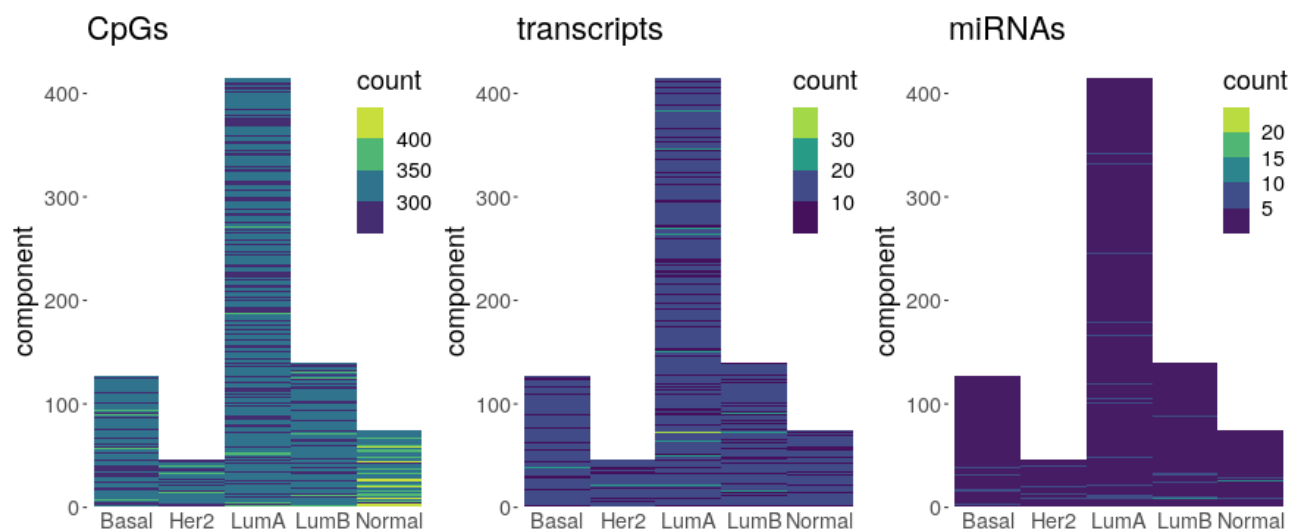

**Figure S2.** Selected features per subtype. Each row is a different matrix component and the color indicates how many features were selected in the component

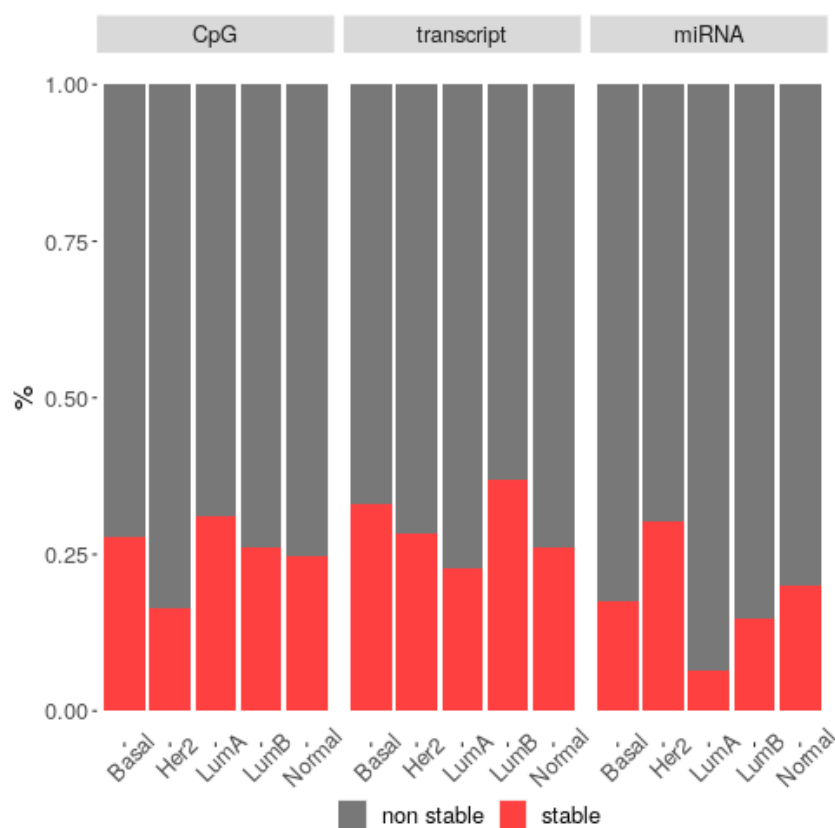

**Figure S3.** Proportion of stable features per omic and dataset

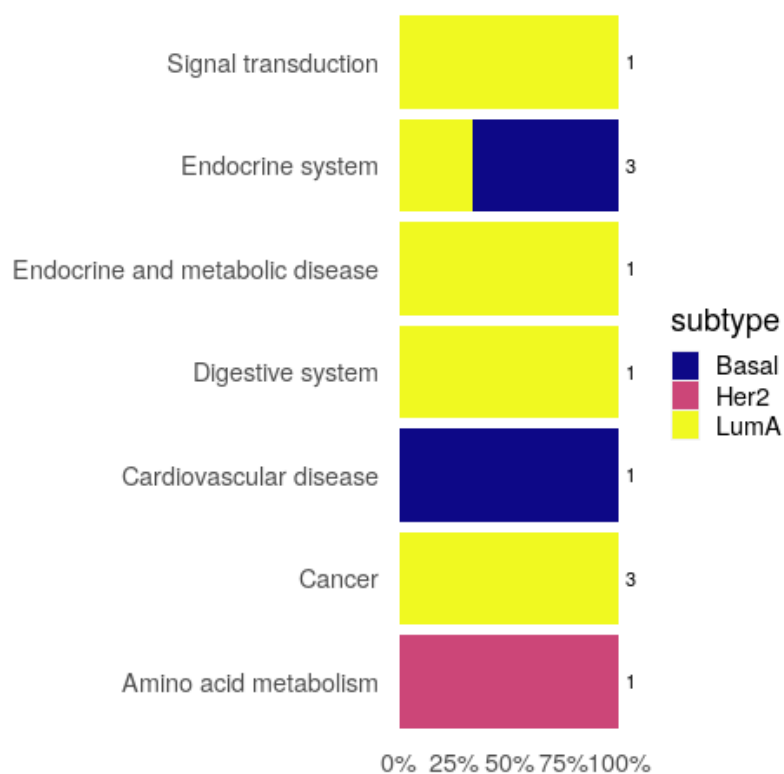

**Figure S4.** Exclusive KEGG classes. There is no significant bias for any of these categories
